# Supplementary material for: Phrenic Nerve Injury During Cryoballoon-Based Pulmonary Vein Isolation: Results of the Worldwide YETI Registry
Source: PubMed Central journal article supplement — Circ Arrhythm Electrophysiol. 2021 Dec 28;15(1):e010516. doi: 10.1161/CIRCEP.121.010516 (PMC8772436; doi:10.1161/circep.121.010516), 2021-12-28
Supplement: hae-15-e010516-s001.pdf [file hae-15-e010516-s001.pdf]

## **SUPPLEMENTAL MATERIAL**

### **SUPPLEMENTAL METHODS**

#### *Assessment of Effective Refractory Period & Sinus Node Function*

Effective refractory period (ERP) at the proximal and distal coronary sinus was performed. Briefly, ERPs were measured at two cycle lengths (600ms/400ms) using a pacing drive train of 8 beats followed by a single extrastimulus commencing at a coupling interval of 150ms and incrementing by 10ms until local capture. The ERP was defined as the longest extrastimulus that failed to capture. Sinus node recovery time (SNRT), evaluated by 30 second burst pacing (600ms/500ms/400ms), was determined as the longest time from the stimulus artefact to the earliest atrial activity. The corrected SNRT was determined by correcting for the underlying sinus cycle length.

#### *Ablation Procedure*

Wide antral circumferential pulmonary vein isolation (PVI) was achieved utilizing an irrigated-tip radiofrequency ablation catheter (power: 25W [posteriorly] – 30W; contact force: 10-40g anteriorly, 10-25g posteriorly). The primary procedural endpoint was demonstration of entrance and exit block of all pulmonary veins following adenosine and 30 minute waiting period.

#### *Electrogram Analysis*

Bipolar intracardiac electrograms and 12-lead surface electrocardiography (ECG) were recorded simultaneously on a digital amplifier system (EPMed Systems, NJ). Intracardiac electrograms were filtered from 30 to 500 Hz.

For activation time, points was analysed at 200 mm/s sweep speed and annotated at the maximum negative dV/dt for unipolar signals or the peak sharp of the bipolar electrogram. Although data was collected using the Confidense algorithm, an internal point filter to within

5mm of the chamber surface geometry was applied and all acquired points were manually annotated. Only points demonstrating near-field characteristics of at least 2 sharp peaks and consistent with anatomically adjacent signals in terms of signal quality and electrogram timing were included. Points that did not fit these criteria, ectopic beats and artefact were excluded. Following extensive annotation, signal processing was also performed offline (MATLAB 9.1, Mathworks, MA, USA).

#### *Conduction Velocity Analysis*

To determine conduction velocity, the polynomial algorithm assigns a fitting 'window' per region with a minimum of 20 points required. Each region is assigned subsets of Cartesian coordinates in space and activation time. These are fitted to a smooth polynomial surface in three-dimensional space, using a standard least squares algorithm, which provides robustness against outliers. The gradient is then calculated from the fit and used to calculate velocity components, with final velocities calculated from the weighted average of velocity components from every fit including that point.

#### *Follow-up and Arrhythmia Detection*

Antiarrhythmic medications and anticoagulation were managed according to physician preference and current guidelines. In general, antiarrhythmics were stopped in the absence of arrhythmia at 4-6 weeks. Recurrence was defined as documented AF or atrial tachycardia (AT) >30s following a 3-month blanking period. Time to recurrence was determined using either cardiac rhythm management devices (pre-existing pacemaker or insertable cardiac monitor [ICM – Medtronic Linq™, Minneapolis, MN, USA]) or Holter monitoring at 3, 6, and 12 months post-ablation followed by 6-monthly thereafter until study completion. Repeat ablation procedures were performed in patients with refractory symptomatic recurrent atrial

arrhythmia with adjunctive lesion sets (cavotricuspid isthmus and posterior wall isolation) performed according to operator preference.

### *Statistical Analysis*

Data analysis was performed using SPSS software (Version 23, IBM, Armonk, New York).

Normality of all quantitative variables was assessed using the Shapiro-Wilk test.

A mixed random effects model was used for comparison between multiple regional measures within each patient (ie. CV, voltage). To investigate regional variation, region (6 LA segments) and group (male and female) were modelled as fixed effects with a group x region interaction term.

Conventional two-group comparisons were made using unpaired t test for continuous variables, or the chi-squared test for categorical variables for data (ie. Sex, LA size).

General linear model analysis was also performed separately on each parameter to determine univariable predictors of voltage, CV and complex signals. Following univariable analysis, all predictors with  $p < 0.1$  were included in a multivariable model. Age and AF duration adjustment was also performed given non-significant differences between groups. Survival curves for freedom from arrhythmia (AF/atrial tachycardia [AT]) were determined using the Kaplan-Meier method and compared using the log-rank test. Cox proportional hazards regression was used to determine univariable ( $p < 0.1$ ), age-adjusted, AF-duration adjusted and multivariable predictors of arrhythmia-free survival following single and multiple procedures. Of the electrophysiologic variables which denote substrate with  $p < 0.1$ , voltage was included in the multivariable model given its reproducible and robust association with atrial fibrosis<sup>29</sup>. Subgroup analysis was also performed between males and females for each variable (ie. AF phenotype).

## SUPPLEMENTAL TABLES

Supplemental Table I. Electrophysiological substrate analysis stratified by atrial fibrillation phenotype and sex.

| <b>Substrate Parameter</b>        | <b>Male</b> | <b>Female</b> | <b>p-value</b>        |
|-----------------------------------|-------------|---------------|-----------------------|
| <b>Bipolar Voltage (mV)</b>       |             |               |                       |
| Paroxysmal AF                     | 1.92 ± 0.22 | 1.62 ± 0.24   | p(group)<0.001        |
| Persistent AF                     | 1.48 ± 0.25 | 1.10 ± 0.17   | p(interactive*)=0.252 |
| <b>Low Voltage Points (%)</b>     |             |               |                       |
| Paroxysmal AF                     | 18.4 ± 4.3  | 24.3 ± 6.5    | p(group)=0.021        |
| Persistent AF                     | 26.9 ± 5.3  | 34.2 ± 5.8    | p(interactive*)=0.124 |
| <b>Conduction Velocity (cm/s)</b> |             |               |                       |
| Paroxysmal AF                     | 46.6 ± 6.0  | 37.8 ± 7.2    | p(group)=0.001        |
| Persistent AF                     | 40.2 ± 6.3  | 28.5 ± 3.6    | p(interactive*)=0.775 |
| <b>Complex Signals</b>            |             |               |                       |
| Paroxysmal AF                     | 4.2 ± 2.3   | 8.7 ± 1.7     | p(groups)<0.001       |
| Persistent AF                     | 7.4 ± 1.8   | 13.0 ± 1.9    | p(interactive*)=0.643 |

Values are mean±SD. \*interactive: group x atrial fibrillation phenotype.

Supplemental Table II. Sinus Node Function and Atrial Refractory Periods

|                    | <b>AF Patients</b> |               |                |
|--------------------|--------------------|---------------|----------------|
|                    | <b>Male</b>        | <b>Female</b> | <b>p-value</b> |
| CSNRT 600ms (ms)   | 326 ± 250          | 283 ± 169     | 0.583          |
| CSNRT 500ms (ms)   | 403 ± 163          | 391 ± 343     | 0.919          |
| CSNRT 400ms (ms)   | 365 ± 118          | 453 ± 212     | 0.382          |
|                    |                    |               |                |
| CSd ERP 600ms (ms) | 257 ± 45           | 265 ± 69      | 0.699          |
| CSd ERP 400ms (ms) | 229 ± 29           | 232 ± 43      | 0.809          |
| CSp ERP 600ms (ms) | 236 ± 38           | 232 ± 43      | 0.892          |
| CSp ERP 400ms (ms) | 224 ± 28           | 234 ± 24      | 0.431          |

CSNRT = Corrected Sinus Node Recovery Time; CSd = Distal Coronary Sinus; CSp =

Proximal Coronary Sinus, ERP = Effective Refractory Period

Supplemental Table III. Univariable and multivariable analysis of voltage, conduction velocity and complex signals

| Bipolar Voltage                     | Univariate                |         | Multivariate              |         |
|-------------------------------------|---------------------------|---------|---------------------------|---------|
|                                     | B coefficient<br>(95% CI) | p-value | B coefficient<br>(95% CI) | p-value |
| Age                                 | -1.86 (-2.39 to -1.32)    | <0.001  | -0.03 (-0.05 to -0.01)    | 0.001   |
| Female Gender                       | -0.46 (-0.76 to -0.16)    | <0.001  | -0.28 (-0.67 to -0.08)    | 0.028   |
| Persistent AF                       | -0.32 (-0.61 to -0.02)    | 0.005   | -0.38 (-0.86 to -0.04)    | 0.019   |
| AF Duration<br>(months)             | -0.003 (-0.006 to -0.001) | 0.038   | -0.001 (-0.005 to 0.002)  | 0.256   |
| Body Mass Index                     | -0.01 (-0.05 to 0.02)     | 0.266   |                           |         |
| Obesity<br>(BMI>30)                 | -0.26 (-0.57 to 0.06)     | 0.046   | 0.16 (-0.73 to 1.06)      | 0.513   |
| Presenting Lab<br>Rhythm AF         | -0.16 (-0.47 to 0.16)     | 0.102   |                           |         |
| Hypertension                        | -0.19 (-0.51 to 0.12)     | 0.141   |                           |         |
| Dyslipidemia                        | -0.05 (-0.37 to 0.27)     | 0.654   |                           |         |
| Diabetes Mellitus                   | -0.19 (-0.59 to 0.98)     | 0.728   |                           |         |
| Ischaemic Heart<br>Disease          | -0.03 (-0.48 to 0.55)     | 0.933   |                           |         |
| Stroke/TIA                          | -0.10 (-0.80 to 1.01)     | 0.783   |                           |         |
| CHA <sub>2</sub> DS <sub>2</sub> VA | -0.15 (-0.28 to -0.02)    | 0.016   | -0.04 (-0.22 to 0.14)     | 0.477   |
| OSA                                 | -0.06 (-0.39 to 0.28)     | 0.710   |                           |         |
| Regular Alcohol<br>Intake           | -0.17 (-0.47 to 0.13)     | 0.157   |                           |         |
| Smoker                              | -0.39 (-1.16 to 0.38)     | 0.216   |                           |         |
| ERT                                 | 0.42 (-0.22 to 1.05)      | 0.111   |                           |         |
| LVEF                                | 0.01 (-0.02 to 0.01)      | 0.093   | 0.01 (-0.03 to 0.01)      | 0.058   |
| LA Size                             | -0.01 (-0.02 to 0.00)     | 0.016   | -0.01 (-0.02 to 0.01)     | 0.382   |
| LA Area                             | -0.01 (-0.02 to 0.00)     | 0.125   |                           |         |

|                                     |                          |       |                         |       |
|-------------------------------------|--------------------------|-------|-------------------------|-------|
| Valvular pathology (mild-moderate)  | -0.03 (-0.31 to 0.47)    | 0.587 |                         |       |
| <b>Conduction Velocity</b>          |                          |       |                         |       |
| Age                                 | -0.27 (-0.76 to 0.21)    | 0.134 |                         |       |
| Female Gender                       | -10.52 (-19.43 to -1.62) | 0.002 | -9.42 (-17.02 to -1.39) | 0.012 |
| Persistent AF                       | -6.52 (-15.31 to 2.24)   | 0.037 | -8.66 (-19.94 to -1.19) | 0.047 |
| AF Duration (months)                | -0.002 (0.04 to -0.01)   | 0.562 |                         |       |
| Body Mass Index                     | -0.19 (-1.16 to 0.78)    | 0.593 |                         |       |
| Obesity (BMI>30)                    | -0.80 (-9.92 to 8.33)    | 0.858 |                         |       |
| Presenting Lab Rhythm AF            | -3.71 (-12.94 to 5.60)   | 0.463 |                         |       |
| Hypertension                        | -4.20 (-13.42 to 5.02)   | 0.129 |                         |       |
| Dyslipidemia                        | -0.27 (-9.46 to 9.10)    | 0.908 |                         |       |
| Diabetes Mellitus                   | -3.17 (-13.12 to 14.46)  | 0.843 |                         |       |
| Ischaemic Heart Disease             | -0.68 (-15.71 to 14.36)  | 0.585 |                         |       |
| Stroke/TIA                          | -7.45 (-33.99 to 19.11)  | 0.470 |                         |       |
| CHA <sub>2</sub> DS <sub>2</sub> VA | -3.56 (-7.38 to -0.20)   | 0.013 | -2.45 (-6.78 to 1.87)   |       |
| OSA                                 | -1.54 (-11.46 to 8.38)   | 0.793 |                         |       |
| Regular Alcohol Intake              | -0.04 (-8.87 to 8.79)    | 0.896 |                         |       |
| Smoker                              | -0.01 (-12.91 to 10.22)  | 0.994 |                         |       |
| ERT                                 | 0.89 (-7.41 to 7.20)     | 0.892 |                         |       |
| LVEF                                | 0.34 (0.11 to 0.79)      | 0.125 |                         |       |
| LA Size                             | -0.35 (-0.69 to -0.01)   | 0.006 | -0.23 (-0.58 to 0.13)   | 0.075 |
| LA Area                             | -0.62 (-1.59 to 0.34)    | 0.078 |                         |       |
| Valvular pathology (mild-moderate)  | -1.87 (-5.06 to 2.26)    | 0.132 |                         |       |

| <b>Complex Signals</b>              |                       |        |                      |       |
|-------------------------------------|-----------------------|--------|----------------------|-------|
| Age                                 | 0.11 (0.03 to 0.30)   | 0.078  | 0.36 (-0.05 to 0.77) | 0.428 |
| Female Gender                       | 4.88 (1.41 to 8.34)   | <0.001 | 5.32 (3.34 to 9.41)  | 0.007 |
| Persistent AF                       | 3.22 (0.14 to 6.42)   | 0.004  | 6.41 (3.05 to 8.88)  | 0.572 |
| AF Duration (months)                | 0.01 (-0.03 to 0.05)  | 0.495  |                      |       |
| Body Mass Index                     | 0.04 (-0.41 to 0.34)  | 0.740  |                      |       |
| Obesity (BMI>30)                    | 0.62 (-2.88 to 4.12)  | 0.707  |                      |       |
| Presenting Lab Rhythm AF            | 1.80 (-5.43 to 1.82)  | 0.451  |                      |       |
| Hypertension                        | 1.33 (-2.28 to 4.95)  | 0.937  |                      |       |
| Dyslipidemia                        | 1.78 (-5.43 to 1.88)  | 0.163  |                      |       |
| Diabetes Mellitus                   | 1.71 (1.56 to 5.81)   | 0.750  |                      |       |
| Ischaemic Heart Disease             | 2.41 (-8.28 to 3.46)  | 0.721  |                      |       |
| Stroke/TIA                          | 2.68 (-7.76 to 13.12) | 0.500  |                      |       |
| CHA <sub>2</sub> DS <sub>2</sub> VA | 0.69 (-0.86 to 2.19)  | 0.256  |                      |       |
| OSA                                 | 0.24 (-3.64 to 4.13)  | 0.715  |                      |       |
| Regular Alcohol Intake              | 0.84 (-2.61 to 4.31)  | 0.384  |                      |       |
| Smoker                              | 0.91 (-9.76 to 7.93)  | 0.778  |                      |       |
| ERT                                 | -1.03 (-5.69 to 2.62) | 0.382  |                      |       |
| LVEF                                | -0.09 (-0.09 to 0.27) | 0.959  |                      |       |
| LA Size                             | 0.07 (-0.22 to 0.07)  | 0.166  |                      |       |
| LA Area                             | 0.15 (-0.21 to 0.51)  | 0.253  |                      |       |
| Valvular pathology (mild-moderate)  | 0.85 (-2.72 to 3.01)  | 0.791  |                      |       |

*Abbreviations:* AF – Atrial Fibrillation; CI – Confidence Interval; CHA<sub>2</sub>DS<sub>2</sub>-VA – Heart Failure, Hypertension, Age, Diabetes, Stroke, Vascular Disease; ERT - Estrogen Replacement



Therapy; IHD – Ischaemic Heart Disease; OSA – Obstructive Sleep Apnea; LA – Left Atrial;  
LV – Left Ventricular; TIA – Transient Ischemic Attack

Supplemental Table IV. Electrophysiological substrate analysis of sex differences adjusted by age and AF duration, respectively.

| Substrate<br>Parameter            | Male        | Female      | Age-adjusted               |         | AF-duration adjusted        |         |
|-----------------------------------|-------------|-------------|----------------------------|---------|-----------------------------|---------|
|                                   |             |             | B Coefficient<br>(95% CI)  | P-value | B Coefficient<br>(95% CI)   | P-value |
| Bipolar<br>Voltage (mv)           | 1.84 ± 0.15 | 1.45 ± 0.17 | -0.16 (-0.53 to<br>-0.05)  | 0.037   | -0.24 (-0.77 to<br>0.10)    | <0.001  |
| Low Voltage<br>Points (%)         | 23.9 ± 15.4 | 31.7 ± 17.5 | 27.0 (2.60 to<br>65.84)    | 0.033   | 20.63 (5.40 to<br>35.86)    | <0.001  |
| Conduction<br>Velocity<br>(cms/s) | 44.1 ± 6.9  | 34.9 ± 6.1  | -6.59 (-10.81 to<br>-0.13) | 0.012   | -11.03 (-30.41<br>to -2.09) | 0.029   |
| Complex<br>Signals (%)            | 6.0 ± 1.7   | 9.9 ± 1.7   | 5.79 (0.74 to<br>13.77)    | 0.041   | 6.41 (0.12 to<br>12.95)     | 0.007   |

Supplemental Table V. Procedural characteristics

|                                         | <b>Male<br/>(n=74)</b> | <b>Female<br/>(n=42)</b> | <b>p-value</b> |
|-----------------------------------------|------------------------|--------------------------|----------------|
| Procedure time (mins)                   | 141 ± 26               | 138 ± 41                 | 0.645          |
| Fluoroscopy time (mins)                 | 10.2 ± 5.3             | 8.5 ± 3.1                | 0.098          |
| Radiation dose (mGy x cm <sup>2</sup> ) | 15 927 ± 9 125         | 15 152 ± 8 457           | 0.315          |
| Total RF time (mins)                    | 37 ± 8                 | 35 ± 9                   | 0.235          |
| Peri-procedural DCR (%)                 | 27 (36)                | 16 (38)                  | 0.923          |
| PV isolation (%)                        | 74 (100)               | 42 (100)                 | 1.000          |
| Cavotricuspid isthmus ablation (%)      | 12 (16)                | 5 (12)                   | 0.586          |

*Abbreviations:* DCR – Direct Current Cardioversion; PV – Pulmonary Vein

Supplemental Table VI. Follow-up data

|                                      | <b>Male<br/>(n=72)*</b> | <b>Female<br/>(n=41)*</b> | <b>p-value</b> |
|--------------------------------------|-------------------------|---------------------------|----------------|
| Continuous Monitoring (%)            | 40 (56)                 | 21 (51)                   | 0.455          |
| Mean surveillance time (months)      | 22.9 ± 7.5              | 21.8 ± 8.7                | 0.425          |
| Holter Monitoring (%)                | 32 (44)                 | 20 (49)                   | 0.539          |
| Mean surveillance time (hours)       | 174 ± 29                | 167 ± 34                  | 0.310          |
| Mean follow-up (months)              | 23 ± 8                  | 21 ± 9                    | 0.144          |
| Post-ablation antiarrhythmic therapy |                         |                           |                |
| - Any antiarrhythmic (%)             | 12 (17)                 | 14 (34)                   | 0.037          |
| - Flecainide (%)                     | 2 (3)                   | 7 (17)                    | 0.010          |
| - Sotalol (%)                        | 5 (7)                   | 2 (5)                     | 0.658          |
| - Amiodarone (%)                     | 5 (7)                   | 5 (12)                    | 0.374          |

\*3 patients lost to study follow-up (2 males, 1 female)

Supplemental Table VII. Subgroup analyses of single-procedure arrhythmia-free survival stratified by sex.

| Subgroup                    | Male                                 | Female | Hazard Ratio<br>(95% CI) | P value for<br>interaction |
|-----------------------------|--------------------------------------|--------|--------------------------|----------------------------|
|                             | <i>no. of events/no. of patients</i> |        |                          |                            |
| Type of Atrial Fibrillation |                                      |        |                          | 0.540                      |
| Paroxysmal AF               | 4/33                                 | 8/21   | 3.27 (1.02-10.85)        |                            |
| Persistent AF               | 14/39                                | 11/20  | 1.77 (0.95-3.91)         |                            |
| Age                         |                                      |        |                          | 0.712                      |
| <65 years                   | 11/45                                | 9/22   | 1.66 (0.67-4.13)         |                            |
| ≥65 years                   | 7/27                                 | 10/19  | 2.12 (0.79-5.70)         |                            |
| Body Mass Index             |                                      |        |                          | 0.167                      |
| <30 kg/m <sup>2</sup>       | 11/49                                | 13/24  | 2.41 (1.44-7.29)         |                            |
| ≥30 kg/m <sup>2</sup>       | 7/23                                 | 6/17   | 1.16 (0.43-2.02)         |                            |
| Hypertension                |                                      |        |                          | 0.361                      |
| No                          | 10/46                                | 13/26  | 2.12 (1.04-5.19)         |                            |
| Yes                         | 8/26                                 | 6/15   | 1.20 (0.38-3.78)         |                            |
| CHADSVA Score               |                                      |        |                          | 0.910                      |
| <2                          | 13/48                                | 12/25  | 1.86 (0.83-4.14)         |                            |
| ≥2                          | 5/24                                 | 7/16   | 1.69 (0.49-5.84)         |                            |
| Obstructive Sleep Apnoea    |                                      |        |                          | 0.380                      |
| No                          | 9/48                                 | 12/29  | 2.58 (1.09-6.14)         |                            |
| Yes                         | 9/24                                 | 7/12   | 1.45 (0.54-3.92)         |                            |
| Alcohol Intake              |                                      |        |                          | 0.221                      |
| No                          | 7/35                                 | 11/26  | 1.83 (1.16-7.30)         |                            |
| Yes                         | 11/37                                | 8/15   | 1.68 (0.87-3.56)         |                            |

|                    |       |       |                   |       |
|--------------------|-------|-------|-------------------|-------|
| Flecainide         |       |       |                   | 0.407 |
| No                 | 14/57 | 9/24  | 1.32 (0.53-3.32)  |       |
| Yes                | 4/15  | 10/17 | 2.52 (0.77-8.26)  |       |
| Sotalol            |       |       |                   | 0.308 |
| No                 | 13/48 | 14/31 | 1.43 (0.65-3.13)  |       |
| Yes                | 5/24  | 5/10  | 2.64 (0.81-7.45)  |       |
| LVEF               |       |       |                   | 0.136 |
| <50%               | 3/17  | 6/11  | 4.14 (1.37-9.44)  |       |
| ≥50%               | 15/55 | 13/30 | 1.39 (0.66-2.93)  |       |
| Valvular pathology |       |       |                   | 0.649 |
| No                 | 15/57 | 15/32 | 1.823 (0.88-3.78) |       |
| Yes                | 3/15  | 4/9   | 2.69 (0.60-8.42)  |       |

*Abbreviations:* AF – Atrial Fibrillation; CI – Confidence Interval; CHA<sub>2</sub>DS<sub>2</sub>-VA – Heart Failure, Hypertension, Age, Diabetes, Stroke, Vascular Disease; OSA – Obstructive Sleep Apnea; LVEF – Left Ventricular Ejection Fraction

Supplemental Table VIII: Age-adjusted and AF duration-adjusted analysis of single-procedure arrhythmia-free survival

| Variable                              | Age-adjusted             |         | AF-duration adjusted     |         |
|---------------------------------------|--------------------------|---------|--------------------------|---------|
|                                       | Hazard ratio<br>(95% CI) | p-value | Hazard ratio<br>(95% CI) | p-value |
| Age                                   | 1.02 (0.94-1.09)         | 0.294   | 1.01 (0.99-1.01)         | 0.481   |
| Female Gender                         | 2.16 (1.21-4.18)         | 0.021   | 2.11 (1.10-4.08)         | 0.026   |
| Persistent AF                         | 2.85 (1.33-6.14)         | 0.007   | 2.25 (1.11-4.55)         | 0.024   |
| AF Duration<br>(months)               | 1.01 (0.99-1.01)         | 0.481   | 1.00 (0.99-1.01)         | 0.685   |
| Body Mass Index                       | 1.02 (0.93-1.08)         | 0.656   | 1.21 (0.94-1.08)         | 0.847   |
| Obesity (BMI>30)                      | 1.65 (0.70-4.04)         | 0.244   | 1.15 (0.42-1.74)         | 0.657   |
| Presenting Lab<br>Rhythm AF           | 1.34 (0.67-2.67)         | 0.408   | 1.44 (0.74-2.79)         | 0.286   |
| Hypertension                          | 1.18 (0.39-1.70)         | 0.585   | 1.14 (0.43-1.73)         | 0.678   |
| Dyslipidemia                          | 1.21 (0.59-2.46)         | 0.605   | 1.37 (0.70-2.66)         | 0.360   |
| Diabetes Mellitus                     | 1.43 (0.39-4.99)         | 0.702   | 1.11 (0.27-4.62)         | 0.888   |
| Ischaemic Heart<br>Disease            | 1.10 (0.27-2.98)         | 0.862   | 1.13 (0.27-2.90)         | 0.846   |
| Stroke/TIA                            | 1.33 (0.49-5.02)         | 0.676   | 1.42 (0.32-4.14)         | 0.728   |
| CHA <sub>2</sub> DS <sub>2</sub> VA   | 1.05 (0.71-1.29)         | 0.749   | 1.04 (0.73-1.28)         | 0.811   |
| OSA                                   | 1.64 (0.82-3.27)         | 0.159   | 1.77 (0.92-3.42)         | 0.087   |
| Regular Alcohol<br>Intake             | 1.25 (0.91-1.68)         | 0.647   | 1.09 (0.48-1.75)         | 0.783   |
| Estrogen<br>Replacement<br>Therapy    | 0.72 (0.38-1.57)         | 0.438   | 0.79 (0.24-1.83)         | 0.355   |
| LVEF (%)                              | 0.97 (0.99-1.09)         | 0.070   | 0.96 (0.99-1.07)         | 0.153   |
| LA Size                               | 1.01 (0.97-1.02)         | 0.684   | 1.01 (0.97-1.02)         | 0.630   |
| LA Area                               | 1.03 (0.93-1.07)         | 0.894   | 1.00 (0.93-1.07)         | 0.862   |
| Valvular Pathology<br>(Mild-moderate) | 1.47 (0.68-3.25)         | 0.208   | 1.74 (0.77-3.84)         | 0.314   |

|                                        |                  |       |                  |       |
|----------------------------------------|------------------|-------|------------------|-------|
| <b>Electrophysiologic Parameters</b>   |                  |       |                  |       |
| Bipolar Voltage<br>(per -1mV)          | 1.93 (1.03-3.28) | 0.040 | 1.76 (1.01-3.07) | 0.046 |
| Low voltage points<br>(%)              | 1.01 (1.00-1.05) | 0.012 | 1.02 (1.01-1.06) | 0.038 |
| Conduction<br>Velocity<br>(per -1cm/s) | 1.02 (0.99-1.04) | 0.212 | 1.02 (0.98-1.03) | 0.251 |
| Complex Signals<br>(%)                 | 1.04 (1.00-1.09) | 0.036 | 1.05 (1.01-1.09) | 0.021 |



Supplemental Table IX: Univariable and multivariable analysis of multi-procedure arrhythmia-free survival

|                                       | <b>Univariable</b>               |                | <b>Multivariable</b>             |                |
|---------------------------------------|----------------------------------|----------------|----------------------------------|----------------|
| <b>Variable</b>                       | <b>Hazard ratio<br/>(95% CI)</b> | <b>p-value</b> | <b>Hazard ratio<br/>(95% CI)</b> | <b>p-value</b> |
| Age                                   | 1.03 (0.98-1.12)                 | 0.329          |                                  |                |
| Female Gender                         | 2.79 (1.36-5.88)                 | 0.007          | 2.26 (1.01-5.06)                 | 0.049          |
| Persistent AF                         | 2.56 (1.15-5.82)                 | 0.021          | 2.73 (1.16-6.62)                 | 0.031          |
| AF Duration<br>(months)               | 1.01 (0.99-1.01)                 | 0.119          |                                  |                |
| Body Mass Index                       | 1.01 (0.93-1.10)                 | 0.875          |                                  |                |
| Obesity (BMI>30)                      | 1.65 (0.70-4.04)                 | 0.244          |                                  |                |
| Presenting Lab<br>Rhythm AF           | 1.28 (0.61-2.70)                 | 0.520          |                                  |                |
| Hypertension                          | 1.19 (0.38-1.87)                 | 0.674          |                                  |                |
| Dyslipidemia                          | 1.38 (0.63-2.86)                 | 0.442          |                                  |                |
| Diabetes Mellitus                     | 1.52 (0.35-6.25)                 | 0.569          |                                  |                |
| Ischaemic Heart<br>Disease            | 1.32 (0.45-5.56)                 | 0.708          |                                  |                |
| Stroke/TIA                            | 1.28 (0.46-3.57)                 | 0.637          |                                  |                |
| CHA <sub>2</sub> DS <sub>2</sub> VA   | 1.08 (0.74-1.43)                 | 0.857          |                                  |                |
| OSA                                   | 1.54 (0.77-3.23)                 | 0.245          |                                  |                |
| Regular Alcohol<br>Intake             | 1.96 (0.91-4.17)                 | 0.128          |                                  |                |
| Estrogen<br>Replacement<br>Therapy    | 0.53 (0.16-1.74)                 | 0.291          |                                  |                |
| LVEF (%)                              | 0.96 (0.92-1.02)                 | 0.097          | 0.96 (0.94-1.02)                 | 0.064          |
| LA Size                               | 1.01 (0.99-1.04)                 | 0.259          |                                  |                |
| LA Area                               | 1.02 (0.93-1.10)                 | 0.717          |                                  |                |
| Valvular Pathology<br>(Mild-moderate) | 1.61 (0.56-4.67)                 | 0.379          |                                  |                |

| <b>Electrophysiologic Parameters</b>   |                  |       |                  |       |
|----------------------------------------|------------------|-------|------------------|-------|
| Bipolar Voltage<br>(per -1mV)          | 2.63 (1.39-4.76) | 0.003 | 1.75 (0.87-3.57) | 0.116 |
| Low voltage points<br>(%)              | 1.03 (1.01-1.05) | 0.004 |                  |       |
| Conduction<br>Velocity<br>(per -1cm/s) | 1.02 (0.99-1.04) | 0.294 |                  |       |
| Complex Signals<br>(%)                 | 1.05 (1.01-1.09) | 0.035 |                  |       |

*Abbreviations:* AF – Atrial Fibrillation; CI – Confidence Interval; CHA<sub>2</sub>DS<sub>2</sub>-VA – Heart Failure, Hypertension, Age, Diabetes, Stroke, Vascular Disease; IHD – Ischaemic Heart Disease; OSA – Obstructive Sleep Apnea; LA – Left Atrial; LV – Left Ventricular; TIA – Transient Ischemic Attack
